# Supplementary material for: Enzymatic Synthesis and Characterization of a Novel α-1→6-Glucosyl Rebaudioside C Derivative Sweetener
Source: MDPI journal article supplement (doi:10.3390/biom9010027), 2019-01-14
Supplement: s1 [file s1]

Article

# Enzymatic Synthesis and Characterization of a Novel $\alpha$ -1 $\rightarrow$ 6-Glucosyl Rebaudioside C Derivative Sweetener

Supplementary Materials:

Figure S1: <sup>1</sup>H-NMR spectrum of reb C+1G. reb C: rebaudioside C. G: glucose

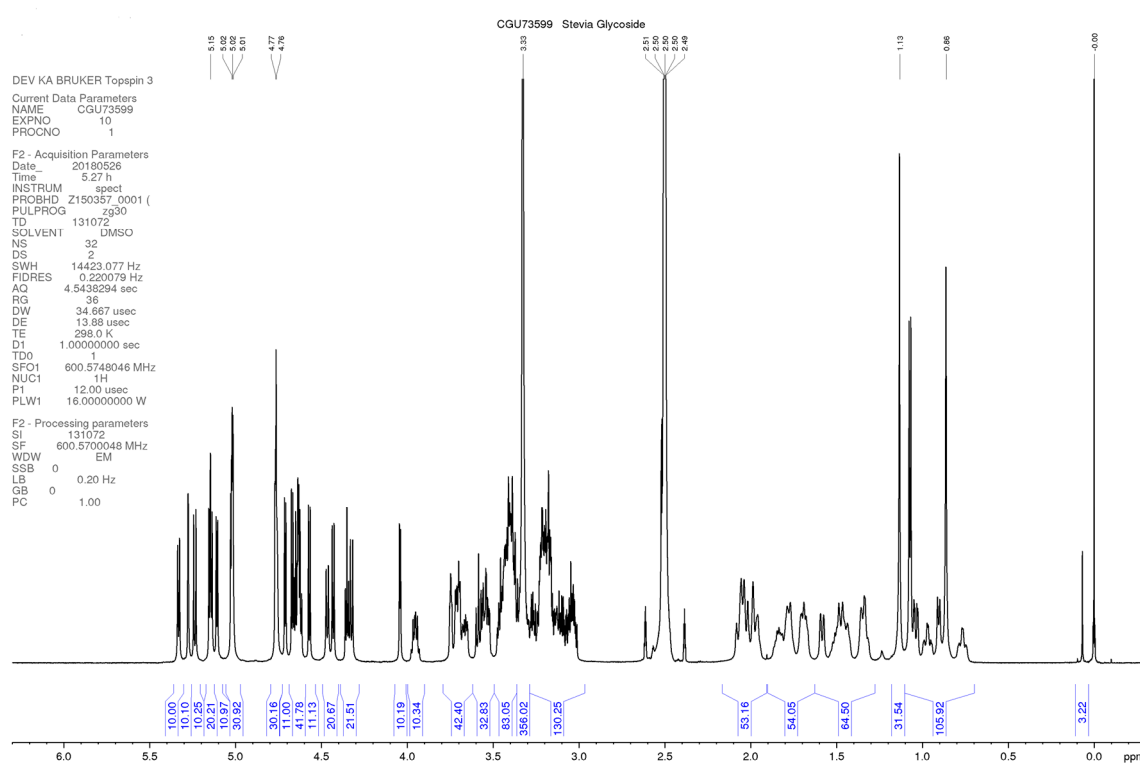

Figure S2: <sup>13</sup>C-NMR spectrum of reb C+1G

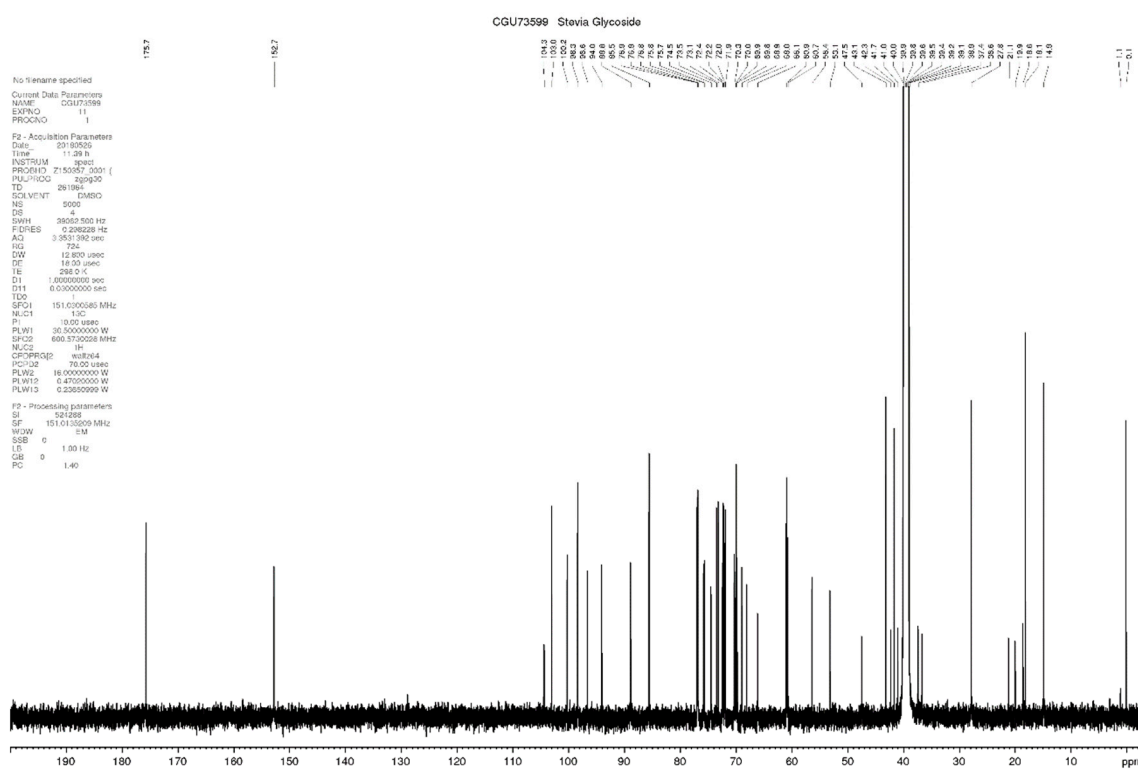

Figure S3: HMBC-NMR spectrum of reb C+1G

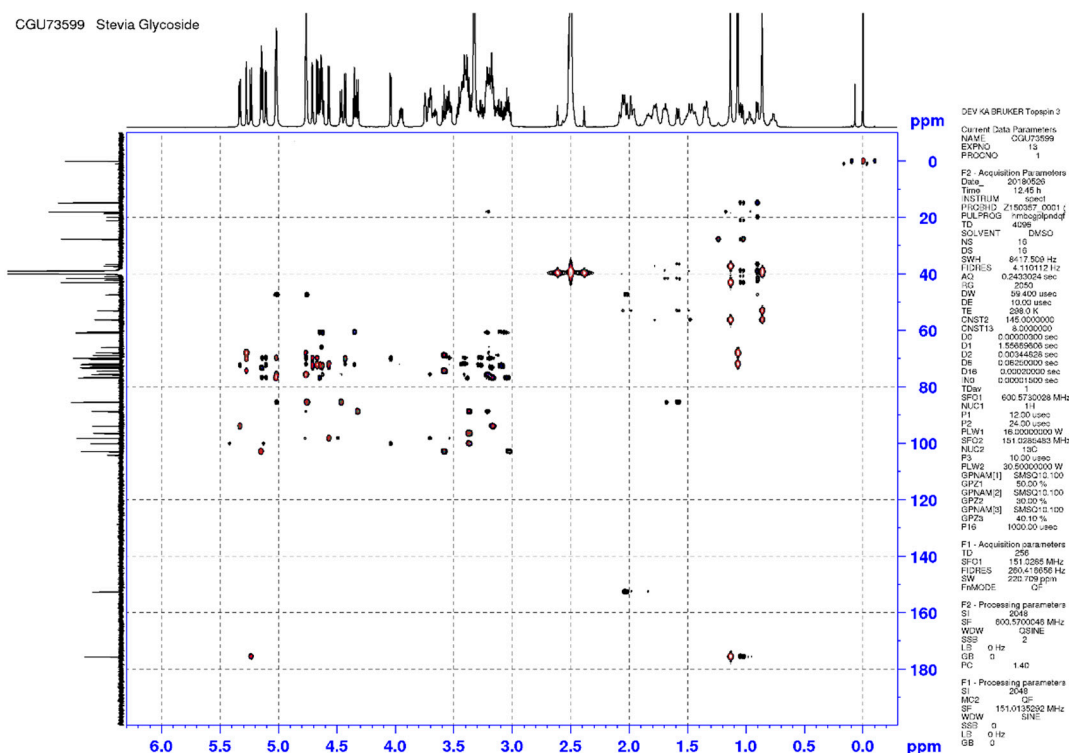

Figure S4: Superimposed HSQC- and HMBC-NMR spectra of reb C+1G

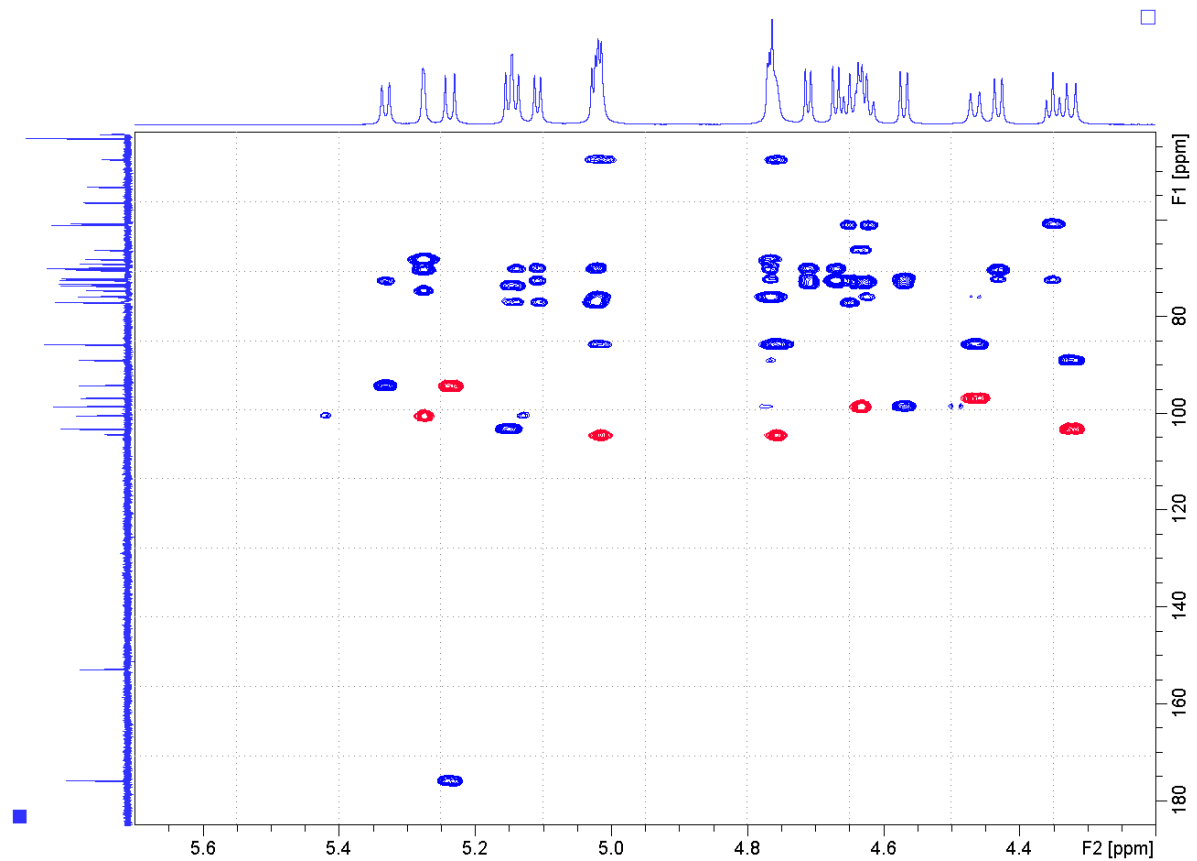

Figure S5: Superimposed HSQC- and HMBC-NMR spectra of reb C+1G

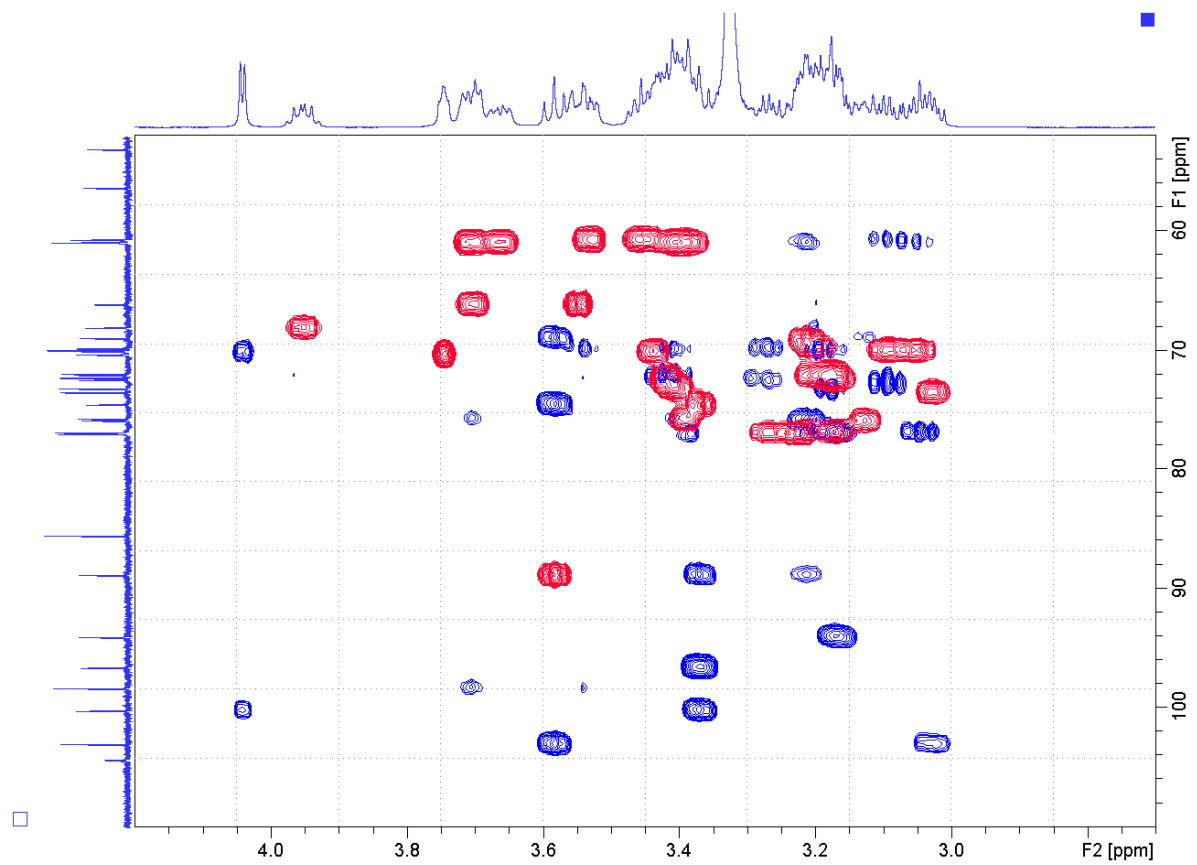

Figure S6: COSY-NMR spectrum of reb C+1G

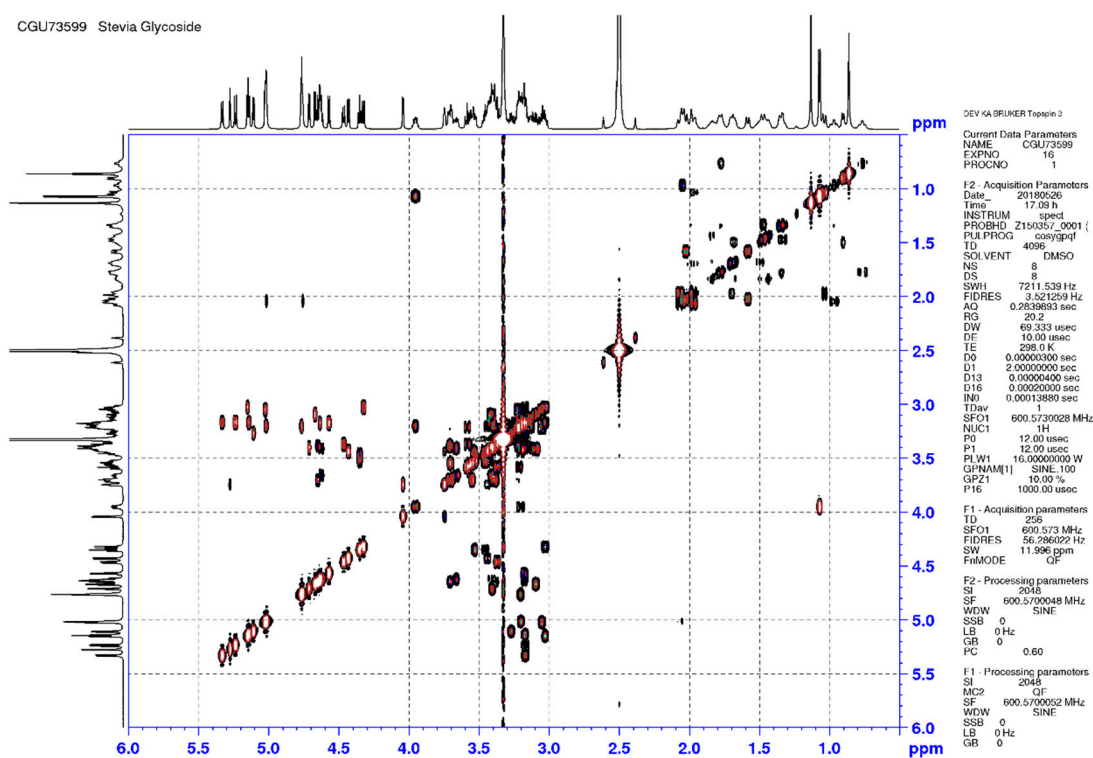

Figure S7: 1H DOSY-NMR of reb C+1G

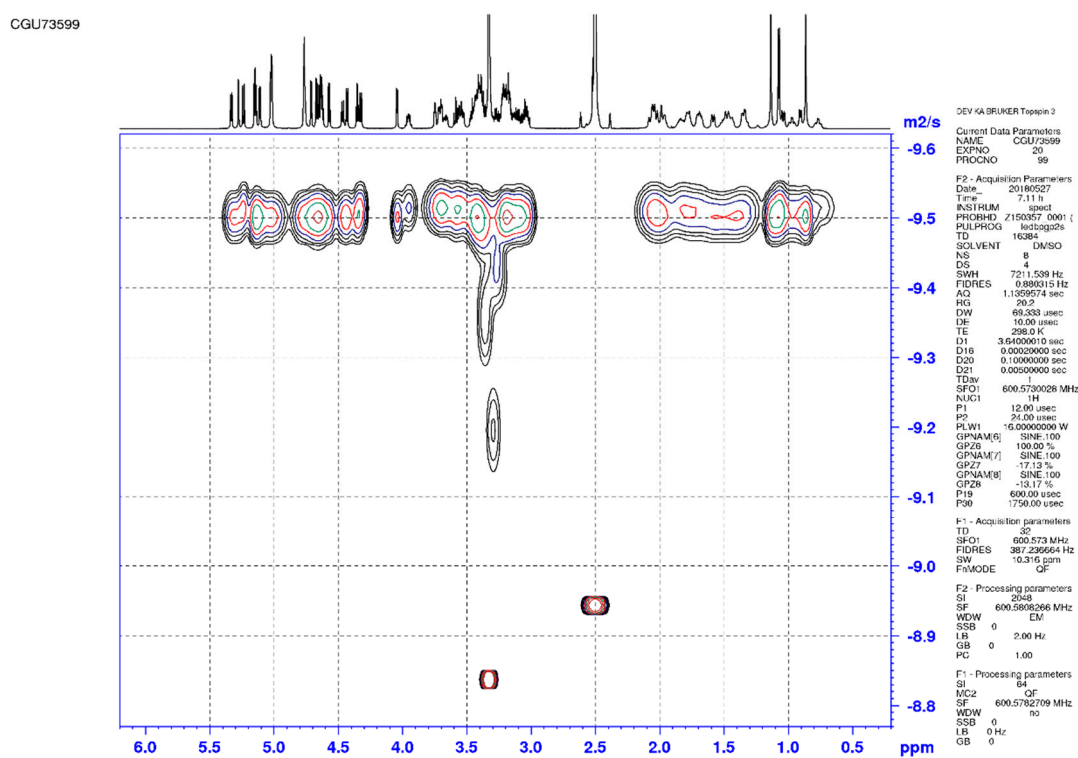

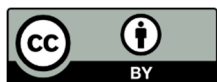

© 2018 by the authors. Submitted for possible open access publication under the terms and conditions of the Creative Commons Attribution (CC BY) license (<http://creativecommons.org/licenses/by/4.0/>).
